# Supplementary material
Source: PubMed Central journal article supplement (PMC5385895)
Supplement: NIHMS831663-supplement.pdf [file NIHMS831663-supplement.pdf]

**Table S1:** Sequence for gBlock which contains 20 bp target size (N), U6 promoter, gRNA scaffold and a termination signal. A gBlock containing each guide sequence was ordered from Integrated DNA Technologies and used for CRISPR experiments.

|                 |                                                                                                                                                                                                                                                                                                                                                                                                                                                                                                          |
|-----------------|----------------------------------------------------------------------------------------------------------------------------------------------------------------------------------------------------------------------------------------------------------------------------------------------------------------------------------------------------------------------------------------------------------------------------------------------------------------------------------------------------------|
| <b>gBlock</b>   | TGTACAAAAAGCAGGCTTTAAAGGAACCAATTCAGTCGACTGGATCCG<br>GTACCAAGGTCGGGCAGGAAGAGGGCCTATTTCCCATGATTCCTTCATA<br>TTTGCATATACGATACAAGGCTGTTAGAGAGATAATTAGAATTAATTTGAC<br>TGTAACACAAAGATATTAGTACAAAATACGTGACGTAGAAAGTAATAATT<br>TCTTGGGTAGTTTGCAGTTTTAAATTATGTTTTAAAATGGACTATCATAT<br>GCTTACCGTAACTTGAAAGTATTTTCGATTTCTTGGCTTTATATATCTTGTG<br>GAAAGGACGAAACACCGNNNNNNNNNNNNNNNNNNNGTTTTAGAGCTA<br>GAAATAGCAAGTTAAATAAGGCTAGTCCGTTATCAACTTGAAAAAGTGG<br>CACCGAGTCGGTGCTTTTTTTCTAGACCCAGCTTTCTTGTACAAAGTTGG<br>CATTA |
| <b>PDL1 g1</b>  | GCTCCAAAGGACTTGTACGG                                                                                                                                                                                                                                                                                                                                                                                                                                                                                     |
| <b>PDL1 g2</b>  | ACTTGTACGTGGTGGAGTAG                                                                                                                                                                                                                                                                                                                                                                                                                                                                                     |
| <b>PDL1 g3</b>  | TATGGCAGCAACGTCACGAG                                                                                                                                                                                                                                                                                                                                                                                                                                                                                     |
| <b>STAT1 g1</b> | GACTCCAAGTTCCTGGAGCG                                                                                                                                                                                                                                                                                                                                                                                                                                                                                     |
| <b>STAT1 g2</b> | CAGCTGGACTCCAAGTTCCG                                                                                                                                                                                                                                                                                                                                                                                                                                                                                     |
| <b>STAT1 g3</b> | TACGATGACAGTTTCCCCAG                                                                                                                                                                                                                                                                                                                                                                                                                                                                                     |
| <b>HVEM g1</b>  | GGGTCGGCACCCCTGGAGCCG                                                                                                                                                                                                                                                                                                                                                                                                                                                                                    |
| <b>HVEM g2</b>  | CCTGAAGGTGTTGTCTGTAG                                                                                                                                                                                                                                                                                                                                                                                                                                                                                     |
| <b>HVEM g3</b>  | TCTGTAGGGGCCTGGCTCCG                                                                                                                                                                                                                                                                                                                                                                                                                                                                                     |
| <b>IFNAR g1</b> | GGCGCGGCGGCCCTGGTGCG                                                                                                                                                                                                                                                                                                                                                                                                                                                                                     |
| <b>IFNAR g2</b> | CTGGTGGCCGGGGCGCCTTG                                                                                                                                                                                                                                                                                                                                                                                                                                                                                     |
| <b>IFNGR g1</b> | CCCGCAGGCGGCAGCTGGCG                                                                                                                                                                                                                                                                                                                                                                                                                                                                                     |
| <b>IFNGR g2</b> | GTCCTGATGCTGTCTGCGAG                                                                                                                                                                                                                                                                                                                                                                                                                                                                                     |
